# Supplementary material for: Dinuclear aluminum complexes bearing methylene-bridged phenoxy-imine ligands and their application in the ring-opening polymerization of rac-lactide
Source: Royal Society of Chemistry journal article supplement (doi:10.1039/d0nj00154f), 2020-01-01
Supplement: d0nj00154f1.pdf [file d0nj00154f1.pdf]

## **New Journal of Chemistry**

### **Electronic Supplementary Information**

for

### **Dinuclear aluminum complexes bearing methylene-bridged phenoxy-imine ligands and their application in the ring-opening polymerization of *rac*-lactide**

Nattawut Yuntawattana, Chutikan Nakhonkhet, Tanin Nanok, Kanokon Upitak,

and Pimpa Homnirun\*

*Laboratory of Catalysts and Advanced Polymer Materials, Department of Chemistry and  
Center of Excellence for Innovation in Chemistry, Faculty of Science, Kasetsart University,  
Bangkok 10900, Thailand*

\*E-mail: fscipph@ku.ac.th

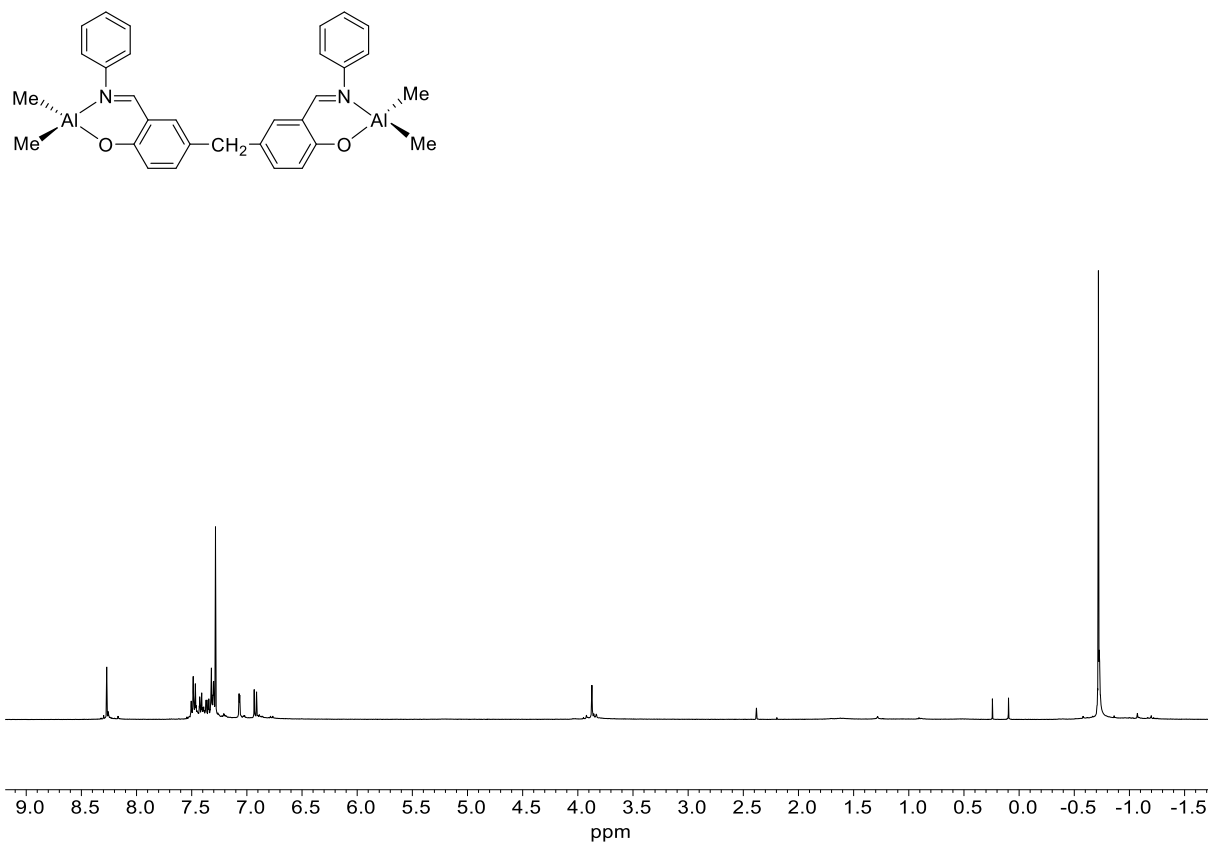

**Fig. S1**  $^1\text{H}$  NMR spectrum of **1** in  $\text{CDCl}_3$  at 298 K.

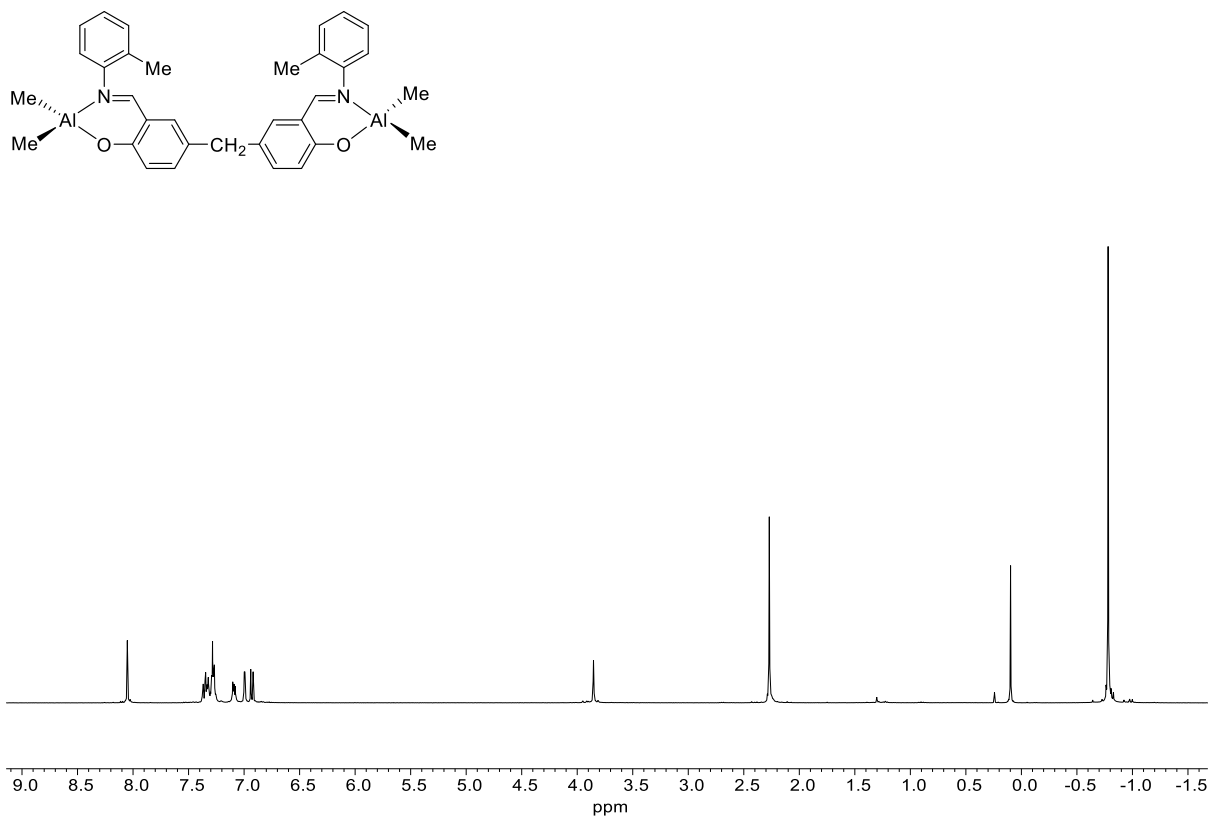

**Fig. S2**  $^1\text{H}$  NMR spectrum of **2** in  $\text{CDCl}_3$  at 298 K.

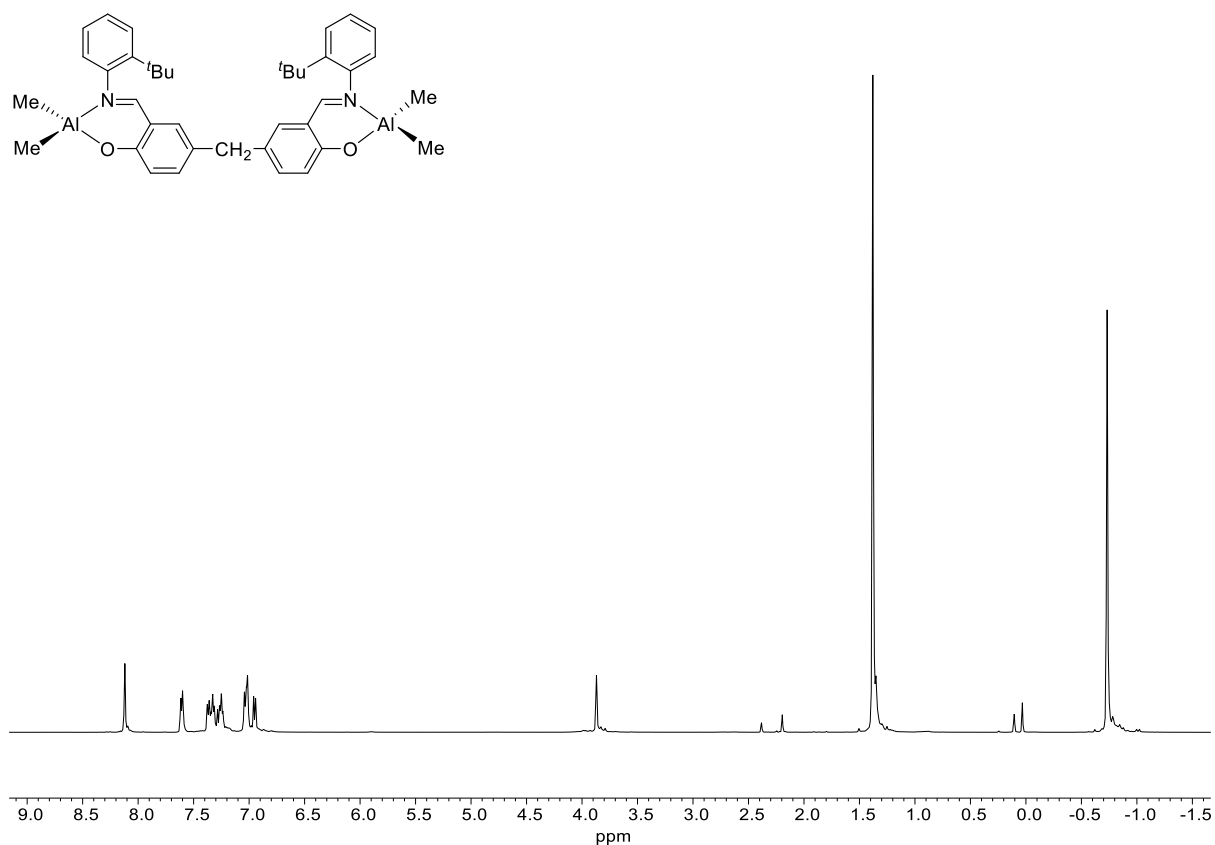

**Fig. S3** <sup>1</sup>H NMR spectrum of **3** in CDCl<sub>3</sub> at 298 K.

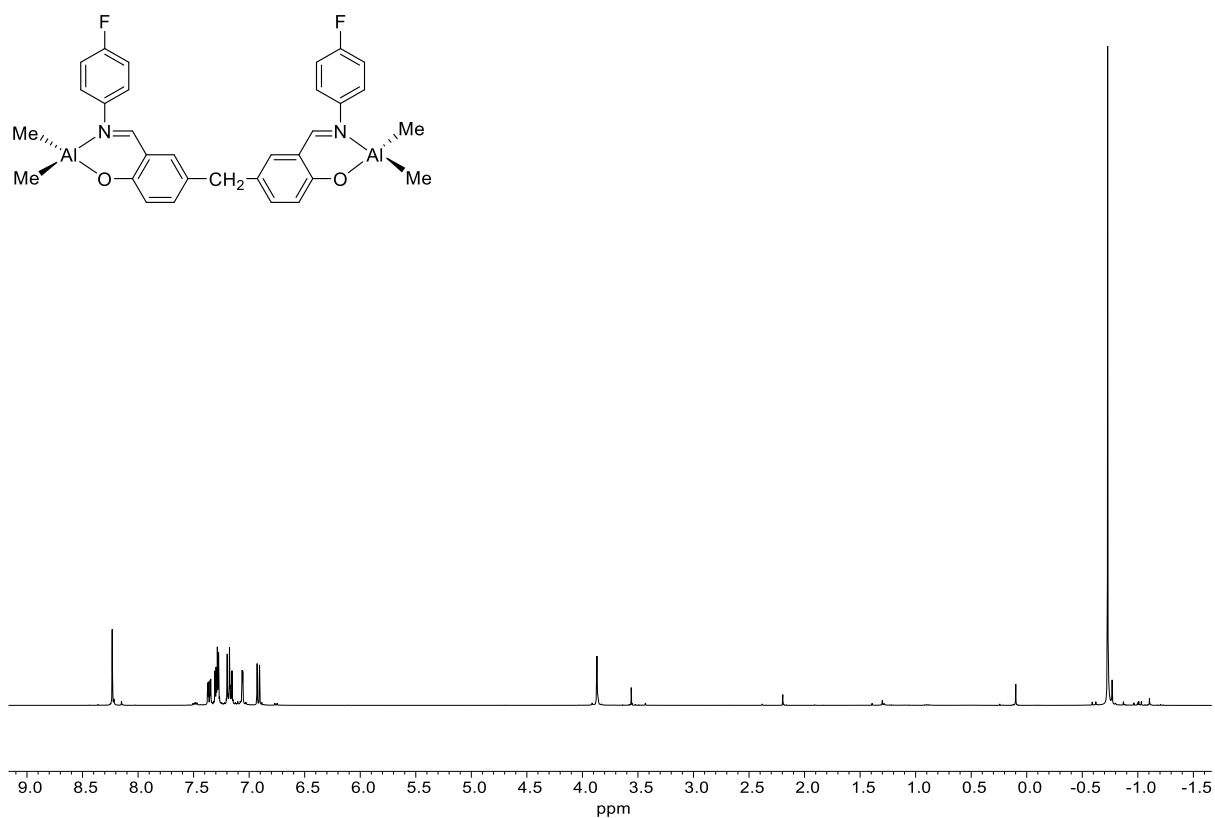

**Fig. S4** <sup>1</sup>H NMR spectrum of **4** in CDCl<sub>3</sub> at 298 K.

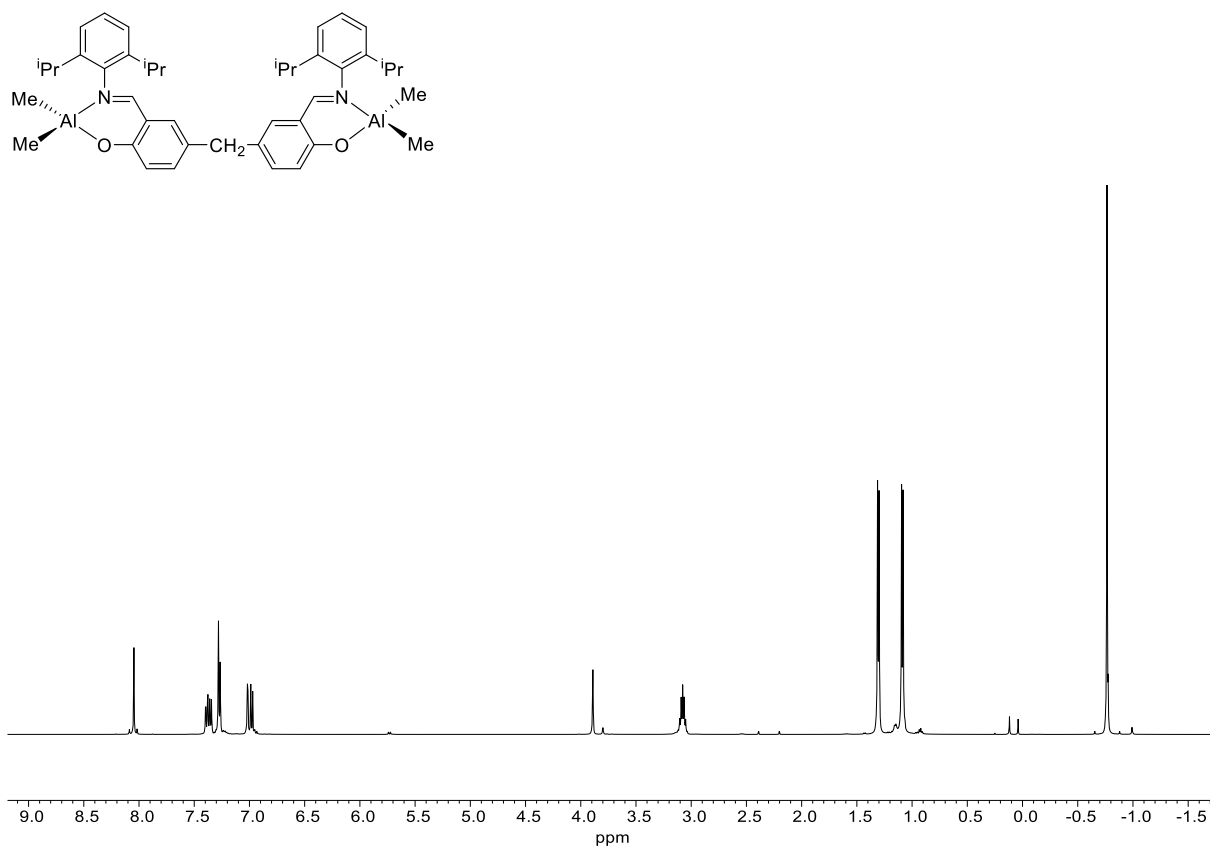

**Fig. S5**  $^1\text{H}$  NMR spectrum of **5** in  $\text{CDCl}_3$  at 298 K.

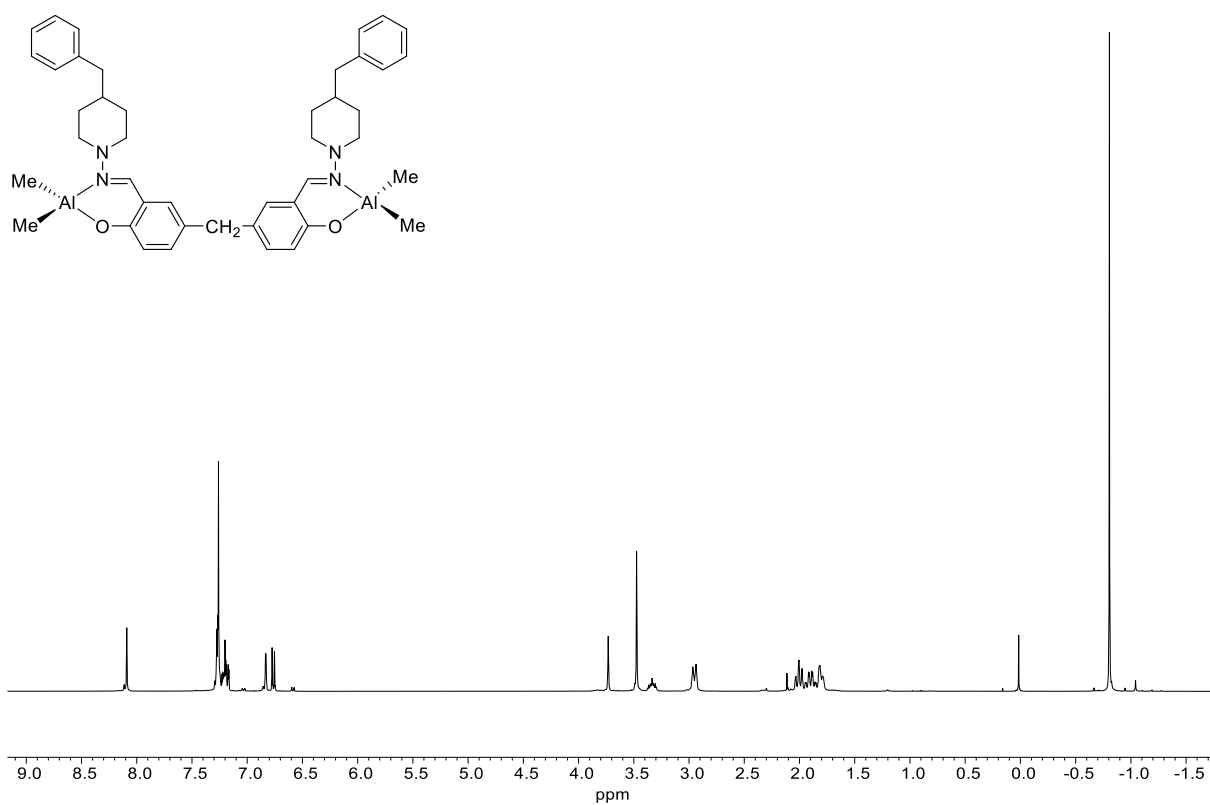

**Fig. S6**  $^1\text{H}$  NMR spectrum of **6** in  $\text{CDCl}_3$  at 298 K.

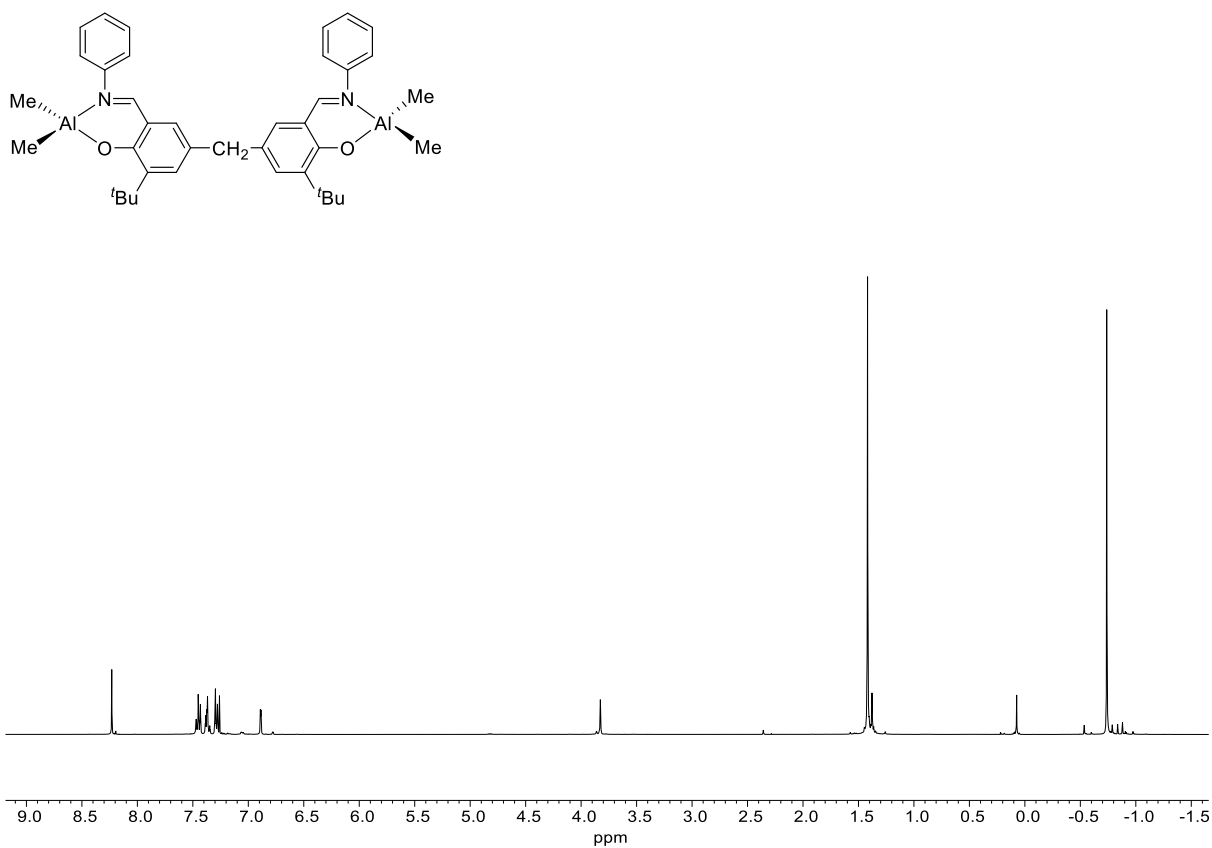

**Fig. S7** <sup>1</sup>H NMR spectrum of **7** in CDCl<sub>3</sub> at 298 K.

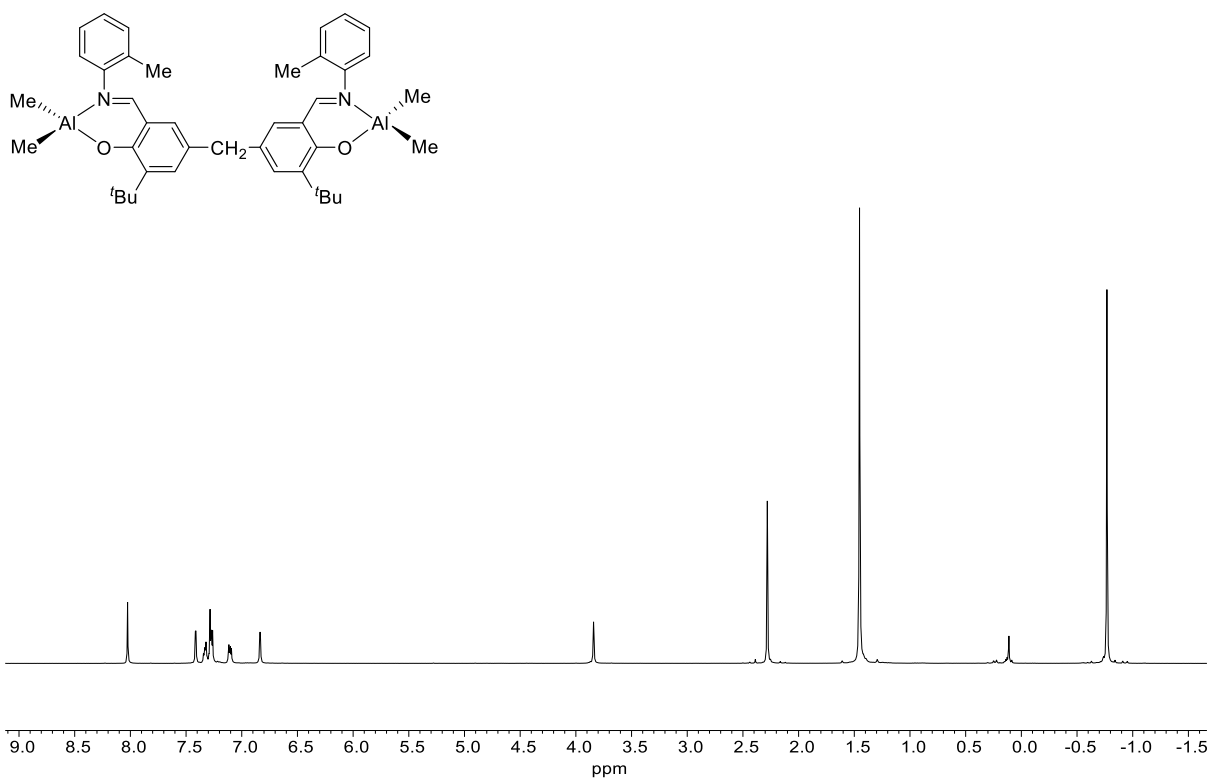

**Fig. S8** <sup>1</sup>H NMR spectrum of **8** in CDCl<sub>3</sub> at 298 K.

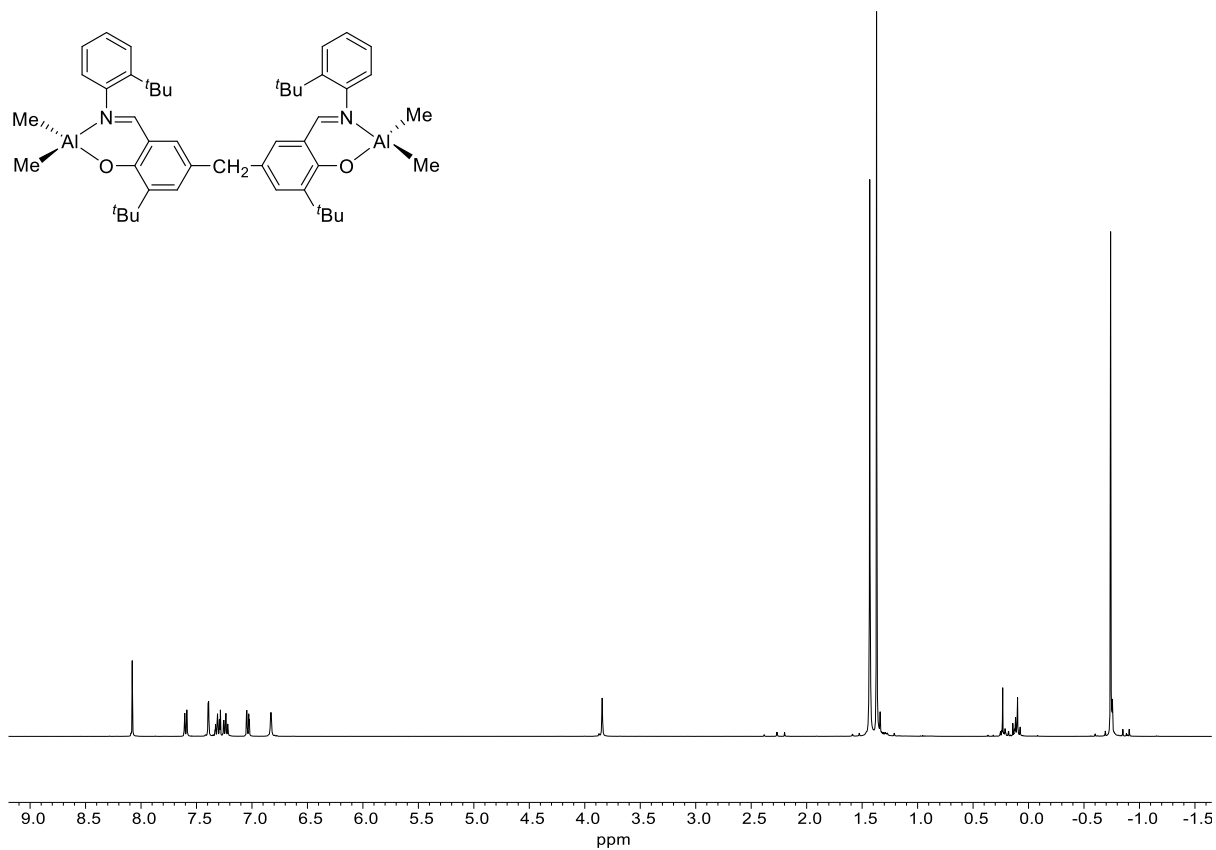

**Fig. S9** <sup>1</sup>H NMR spectrum of **9** in CDCl<sub>3</sub> at 298 K.

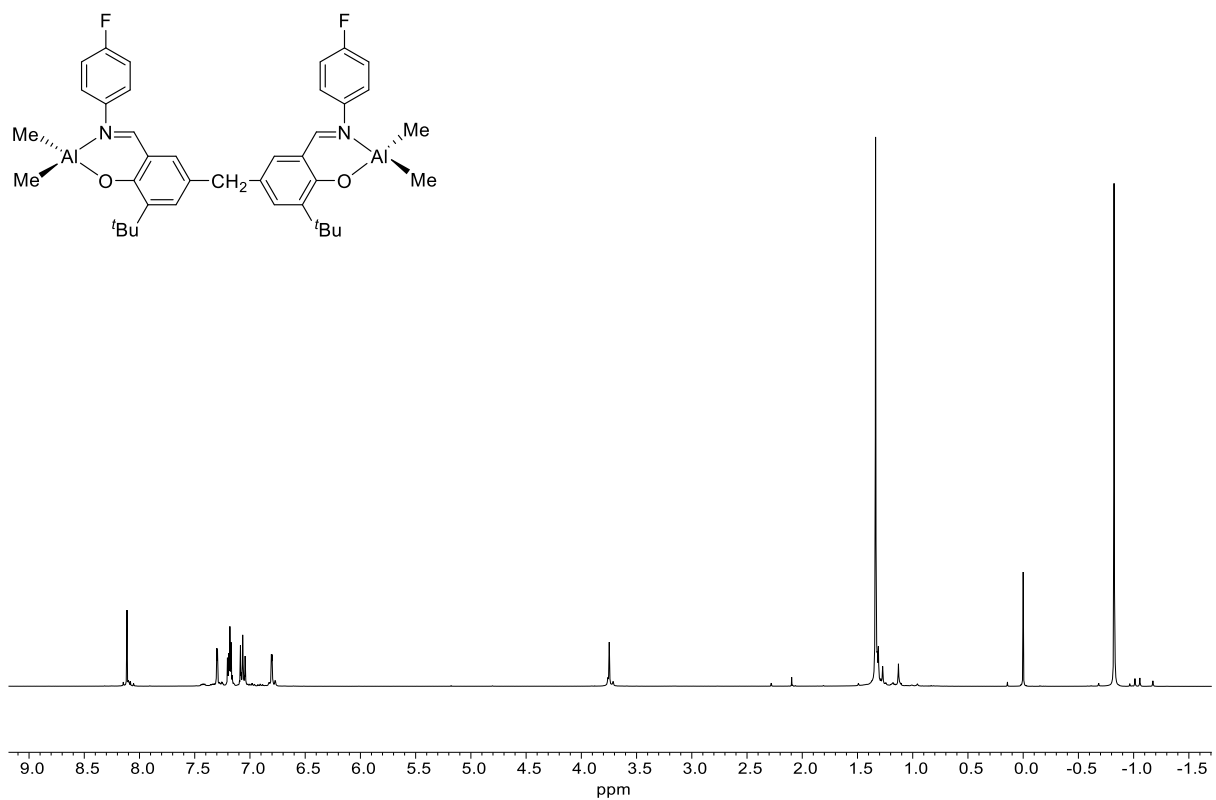

**Fig. S10** <sup>1</sup>H NMR spectrum of **10** in CDCl<sub>3</sub> at 298 K.

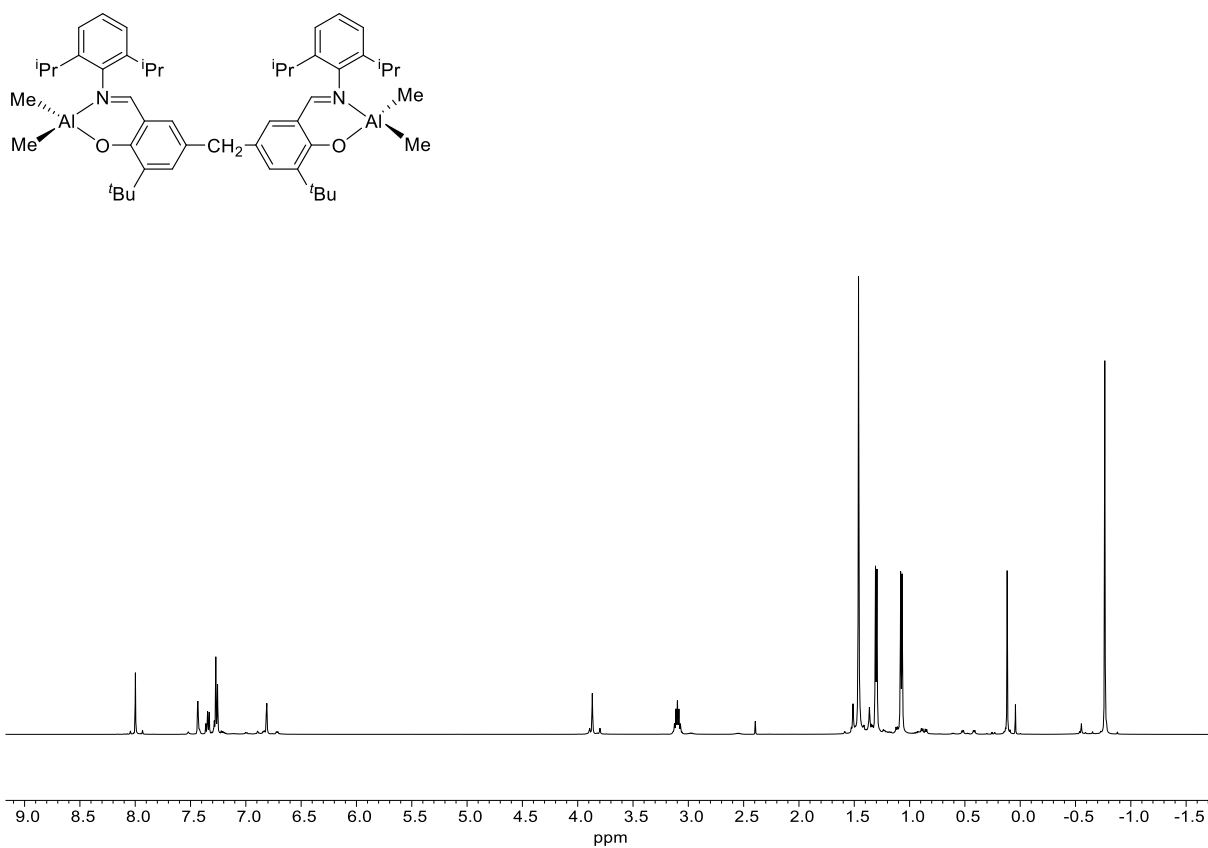

**Fig. S11**  $^1\text{H}$  NMR spectrum of **11** in  $\text{CDCl}_3$  at 298 K.

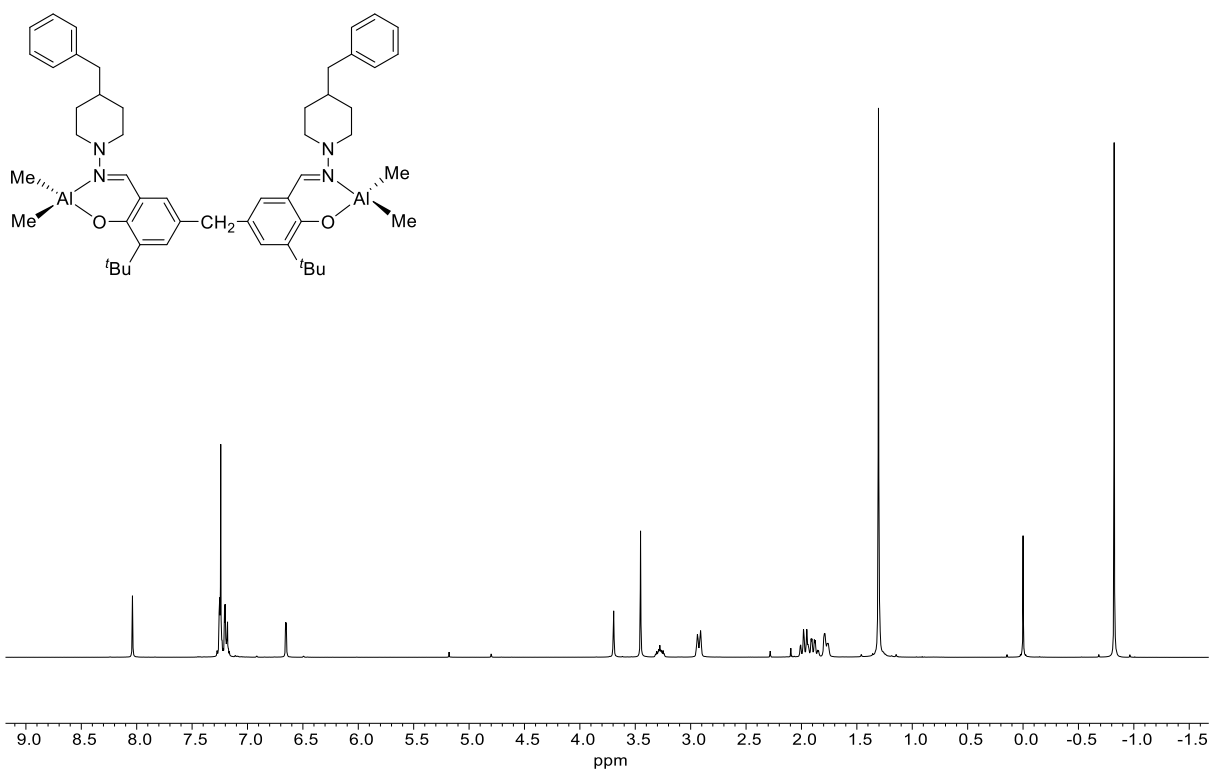

**Fig. S12**  $^1\text{H}$  NMR spectrum of **12** in  $\text{CDCl}_3$  at 298 K.

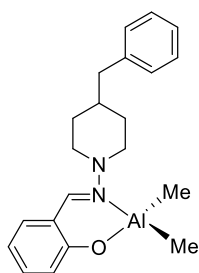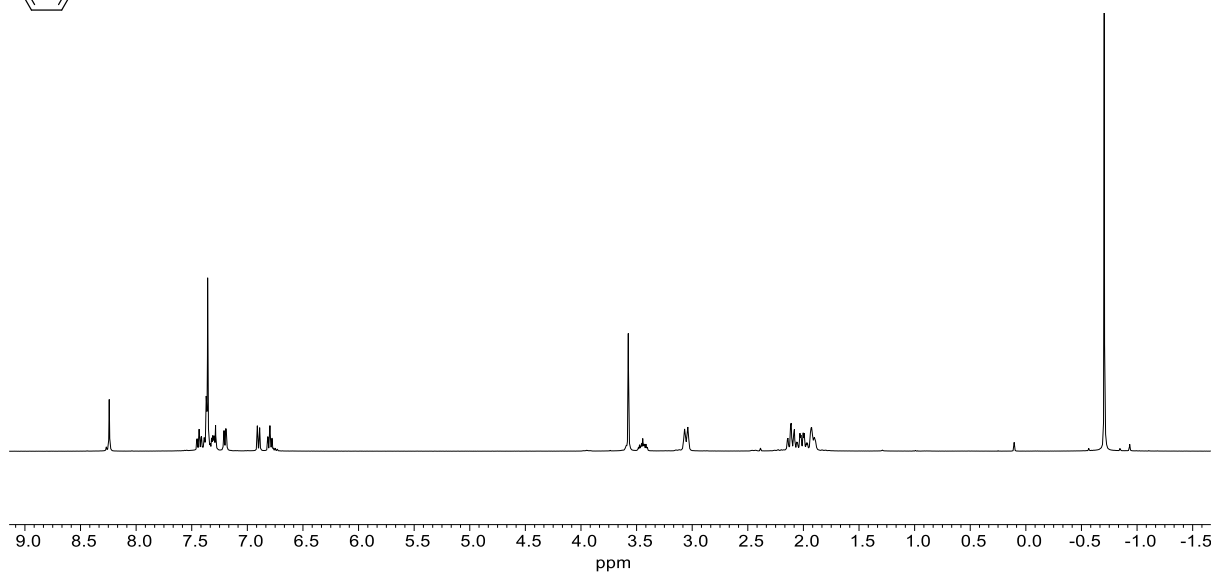

**Fig. S13**  $^1\text{H}$  NMR spectrum of **13** in  $\text{CDCl}_3$  at 298 K.

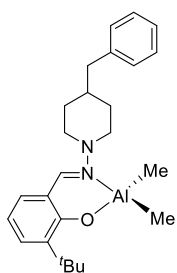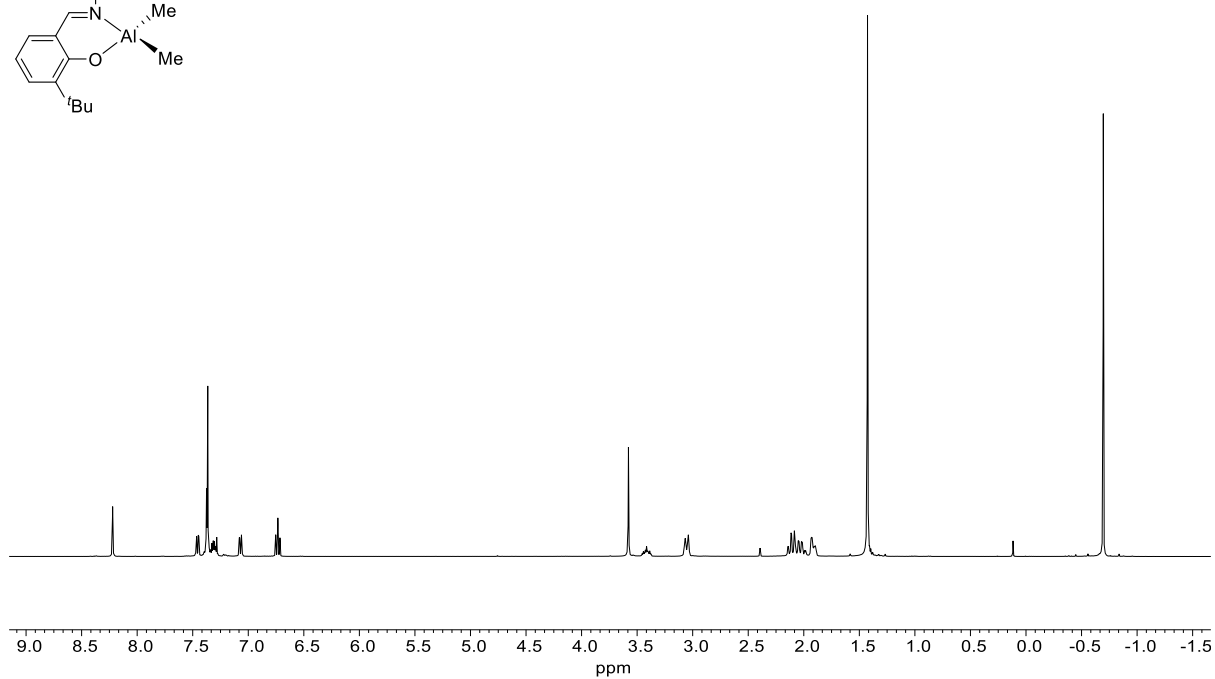

**Fig. S14**  $^1\text{H}$  NMR spectrum of **14** in  $\text{CDCl}_3$  at 298 K.



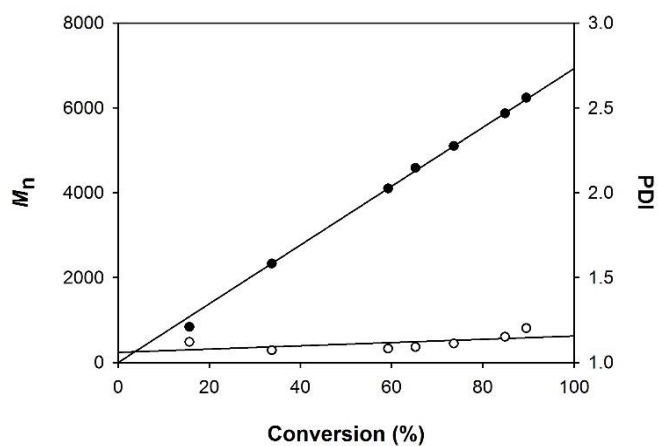

**Fig. S15** Plot of PLA  $M_n$  (●) and PDI (○) as a function of monomer conversion for a *rac*-LA polymerization using **2**/BnOH ( $[LA]_0:[Int]_0:[BnOH]_0 = 100:1:2$ , toluene, 70 °C).

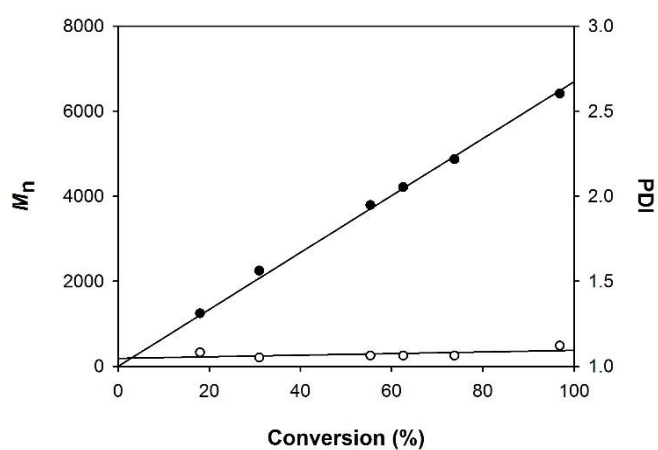

**Fig. S16** Plot of PLA  $M_n$  (●) and PDI (○) as a function of monomer conversion for a *rac*-LA polymerization using **3**/BnOH ( $[LA]_0:[Int]_0:[BnOH]_0 = 100:1:2$ , toluene, 70 °C).

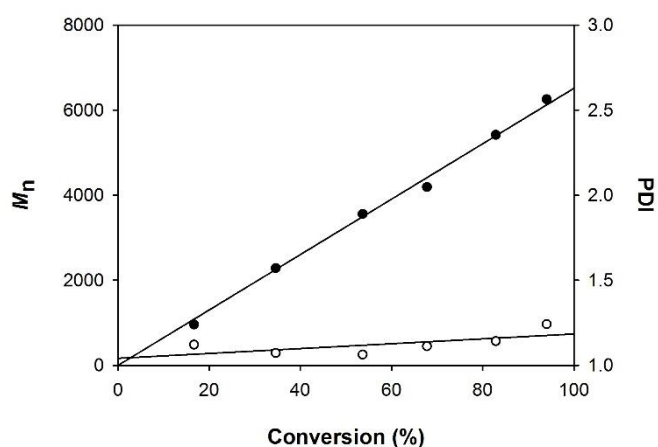

**Fig. S17** Plot of PLA  $M_n$  (●) and PDI (○) as a function of monomer conversion for a *rac*-LA polymerization using **4**/BnOH ( $[LA]_0:[Int]_0:[BnOH]_0 = 100:1:2$ , toluene, 70 °C).

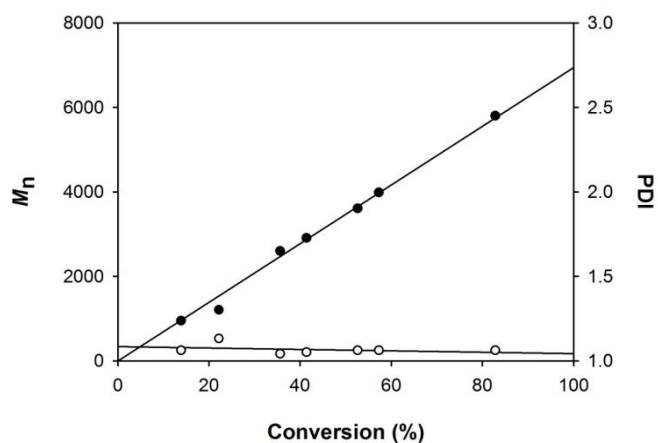

**Fig. S18** Plot of PLA  $M_n$  (●) and PDI (○) as a function of monomer conversion for a *rac*-LA polymerization using **5**/BnOH ( $[LA]_0:[Int]_0:[BnOH]_0 = 100:1:2$ , toluene, 70 °C).

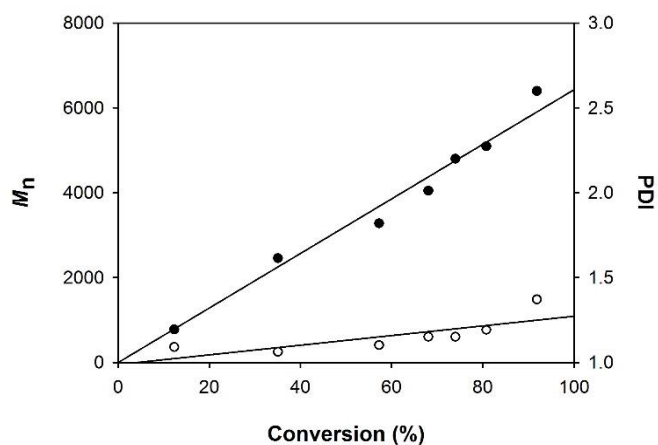

**Fig. S19** Plot of PLA  $M_n$  (●) and PDI (○) as a function of monomer conversion for a *rac*-LA polymerization using **6**/BnOH ( $[LA]_0:[Int]_0:[BnOH]_0 = 100:1:2$ , toluene, 70 °C).

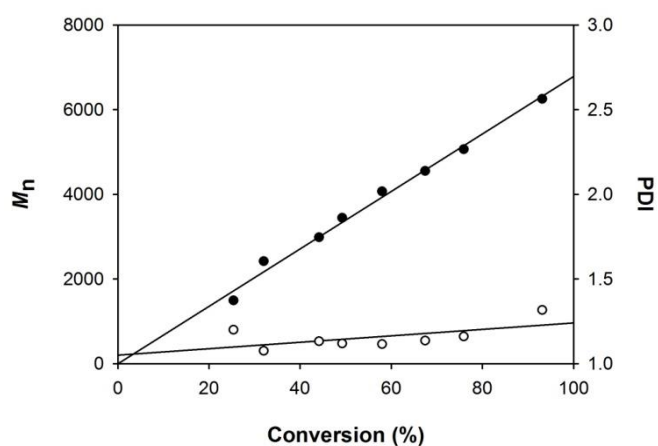

**Fig. S20** Plot of PLA  $M_n$  (●) and PDI (○) as a function of monomer conversion for a *rac*-LA polymerization using **7**/BnOH ( $[LA]_0:[Int]_0:[BnOH]_0 = 100:1:2$ , toluene, 70 °C).

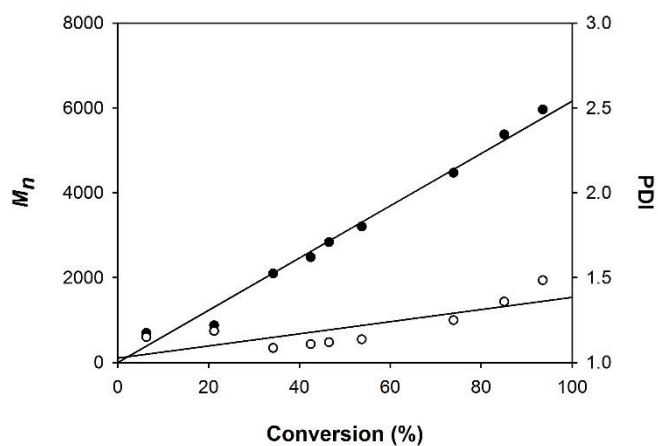

**Fig. S21** Plot of PLA  $M_n$  (●) and PDI (○) as a function of monomer conversion for a *rac*-LA polymerization using **8**/PhCH<sub>2</sub>OH ([LA]<sub>0</sub>: [Int]<sub>0</sub>: [BnOH]<sub>0</sub> = 100:1:2, toluene, 70 °C).

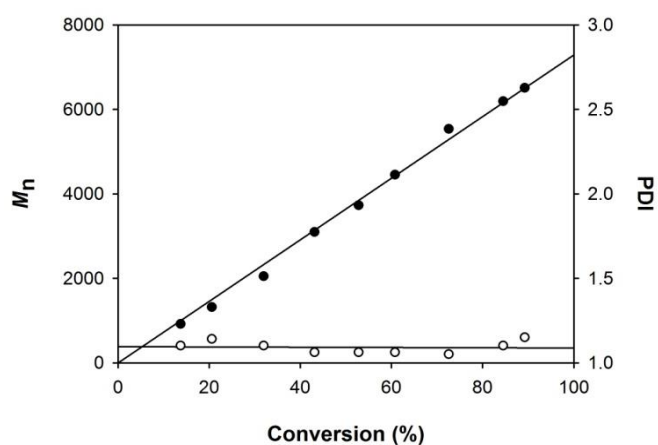

**Fig. S22** Plot of PLA  $M_n$  (●) and PDI (○) as a function of monomer conversion for a *rac*-LA polymerization using **9**/BnOH ([LA]<sub>0</sub>: [Int]<sub>0</sub>: [BnOH]<sub>0</sub> = 100:1:2, toluene, 70 °C).

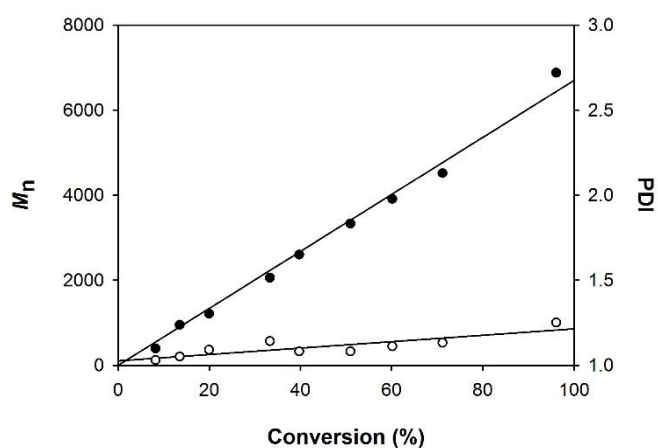

**Fig. S23** Plot of PLA  $M_n$  (●) and PDI (○) as a function of monomer conversion for a *rac*-LA polymerization using **10**/BnOH ([LA]<sub>0</sub>: [Int]<sub>0</sub>: [BnOH]<sub>0</sub> = 100:1:2, toluene, 70 °C).

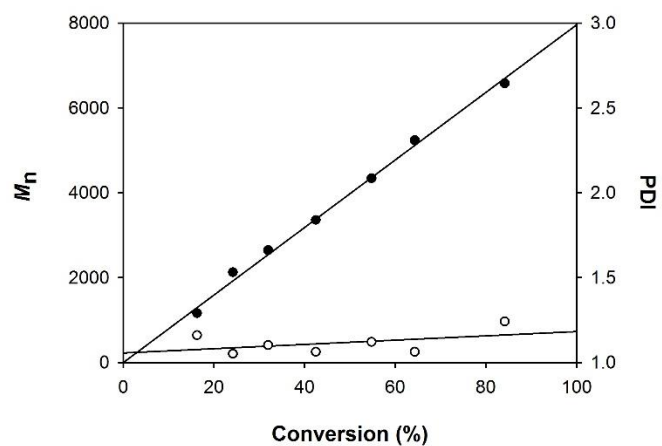

**Fig. S24** Plot of PLA  $M_n$  (●) and PDI (○) as a function of monomer conversion for a *rac*-LA polymerization using **11**/BnOH ( $[LA]_0:[Int]_0:[BnOH]_0 = 100:1:2$ , toluene, 70 °C).

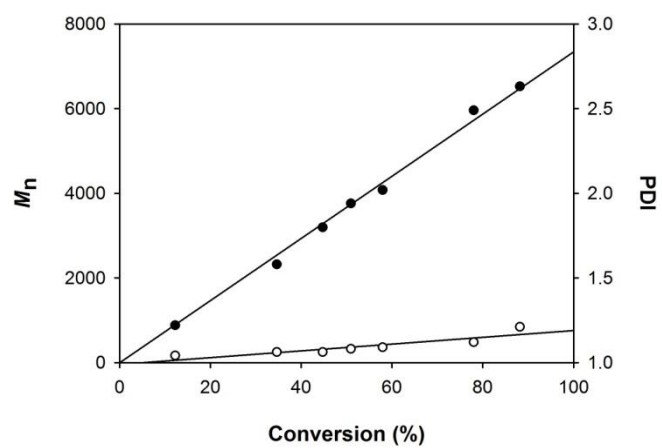

**Fig. S25** Plot of PLA  $M_n$  (●) and PDI (○) as a function of monomer conversion for a *rac*-LA polymerization using **12**/BnOH ( $[LA]_0:[Int]_0:[BnOH]_0 = 100:1:2$ , toluene, 70 °C).

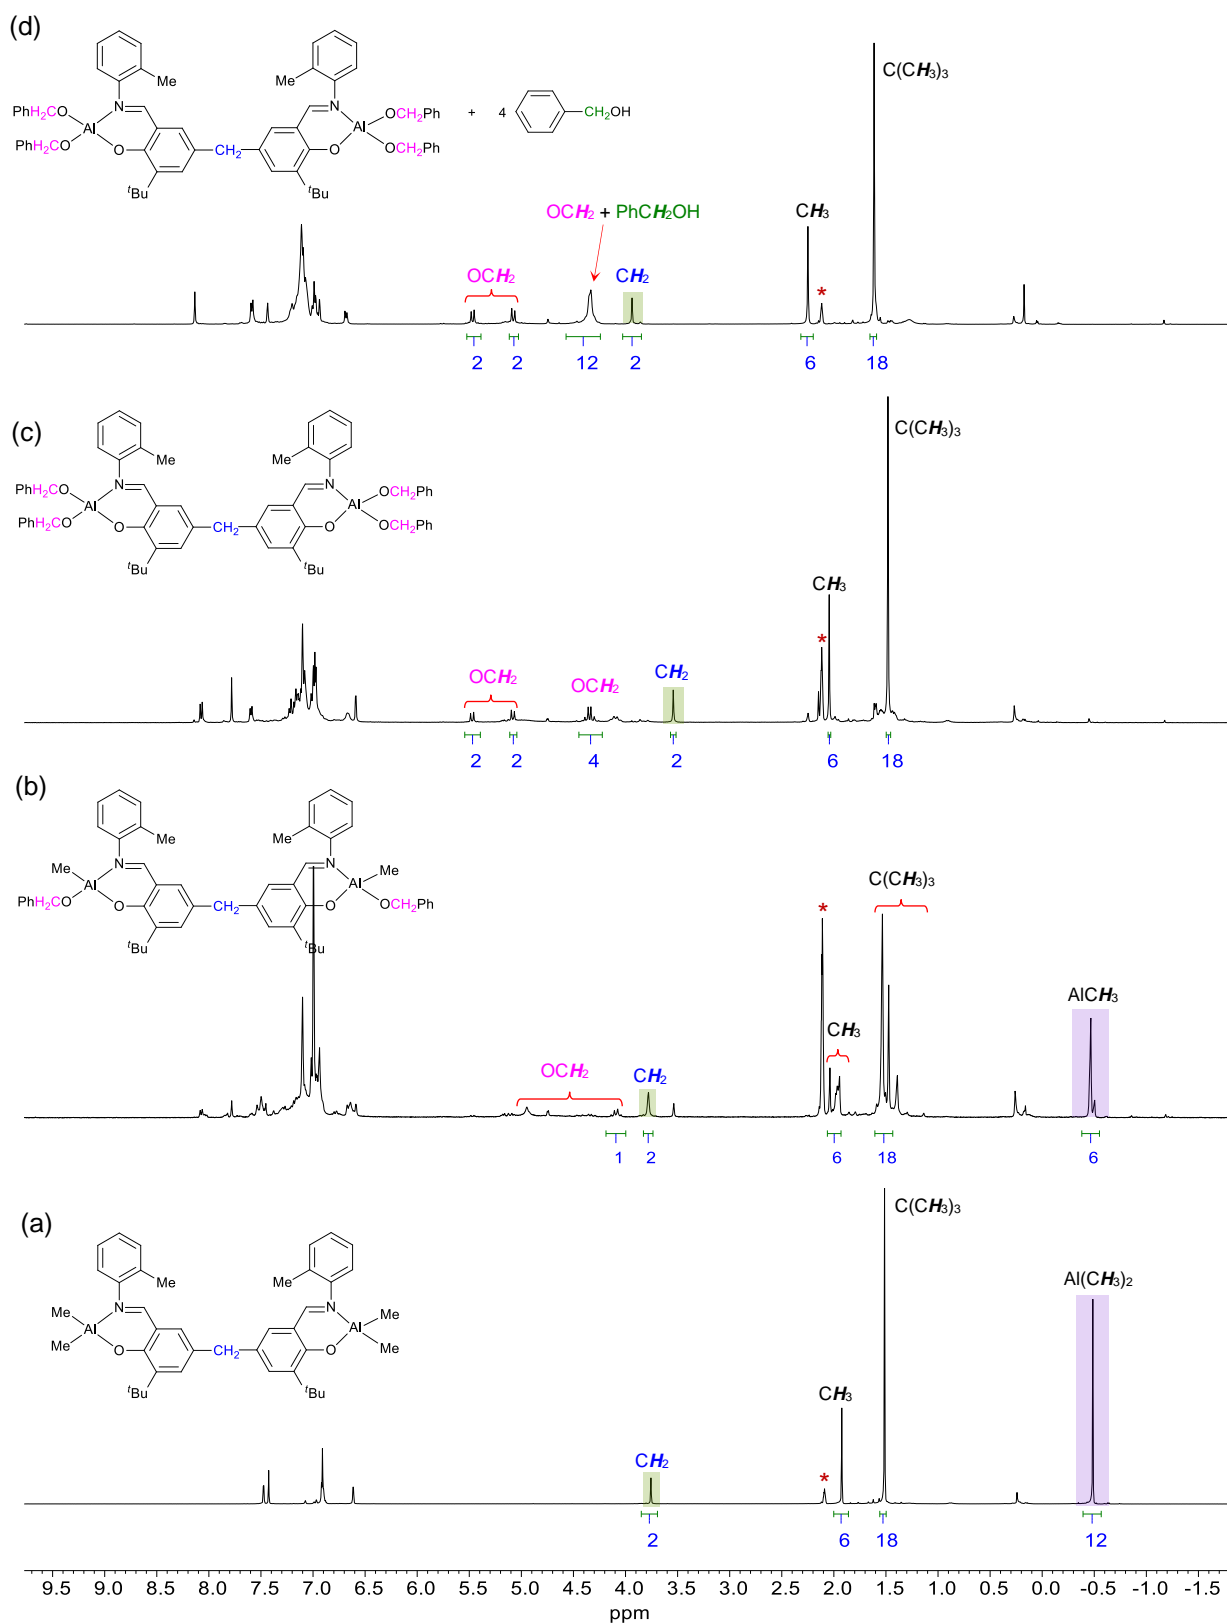

**Fig. S26**  $^1\text{H}$  NMR spectra of (a) complex **8**, (b) complex **8** + 2 eq. BnOH ( $[\text{Int}]_0:[\text{BnOH}]_0 = 1:2$ ) (c) complex **8** + 4 eq. BnOH ( $[\text{Int}]_0:[\text{BnOH}]_0 = 1:4$ ), and (d) complex **8** + 8 eq. BnOH ( $[\text{Int}]_0:[\text{BnOH}]_0 = 1:8$ ) in  $d^8$ -toluene at 70 °C (\* =  $d^8$ -toluene).

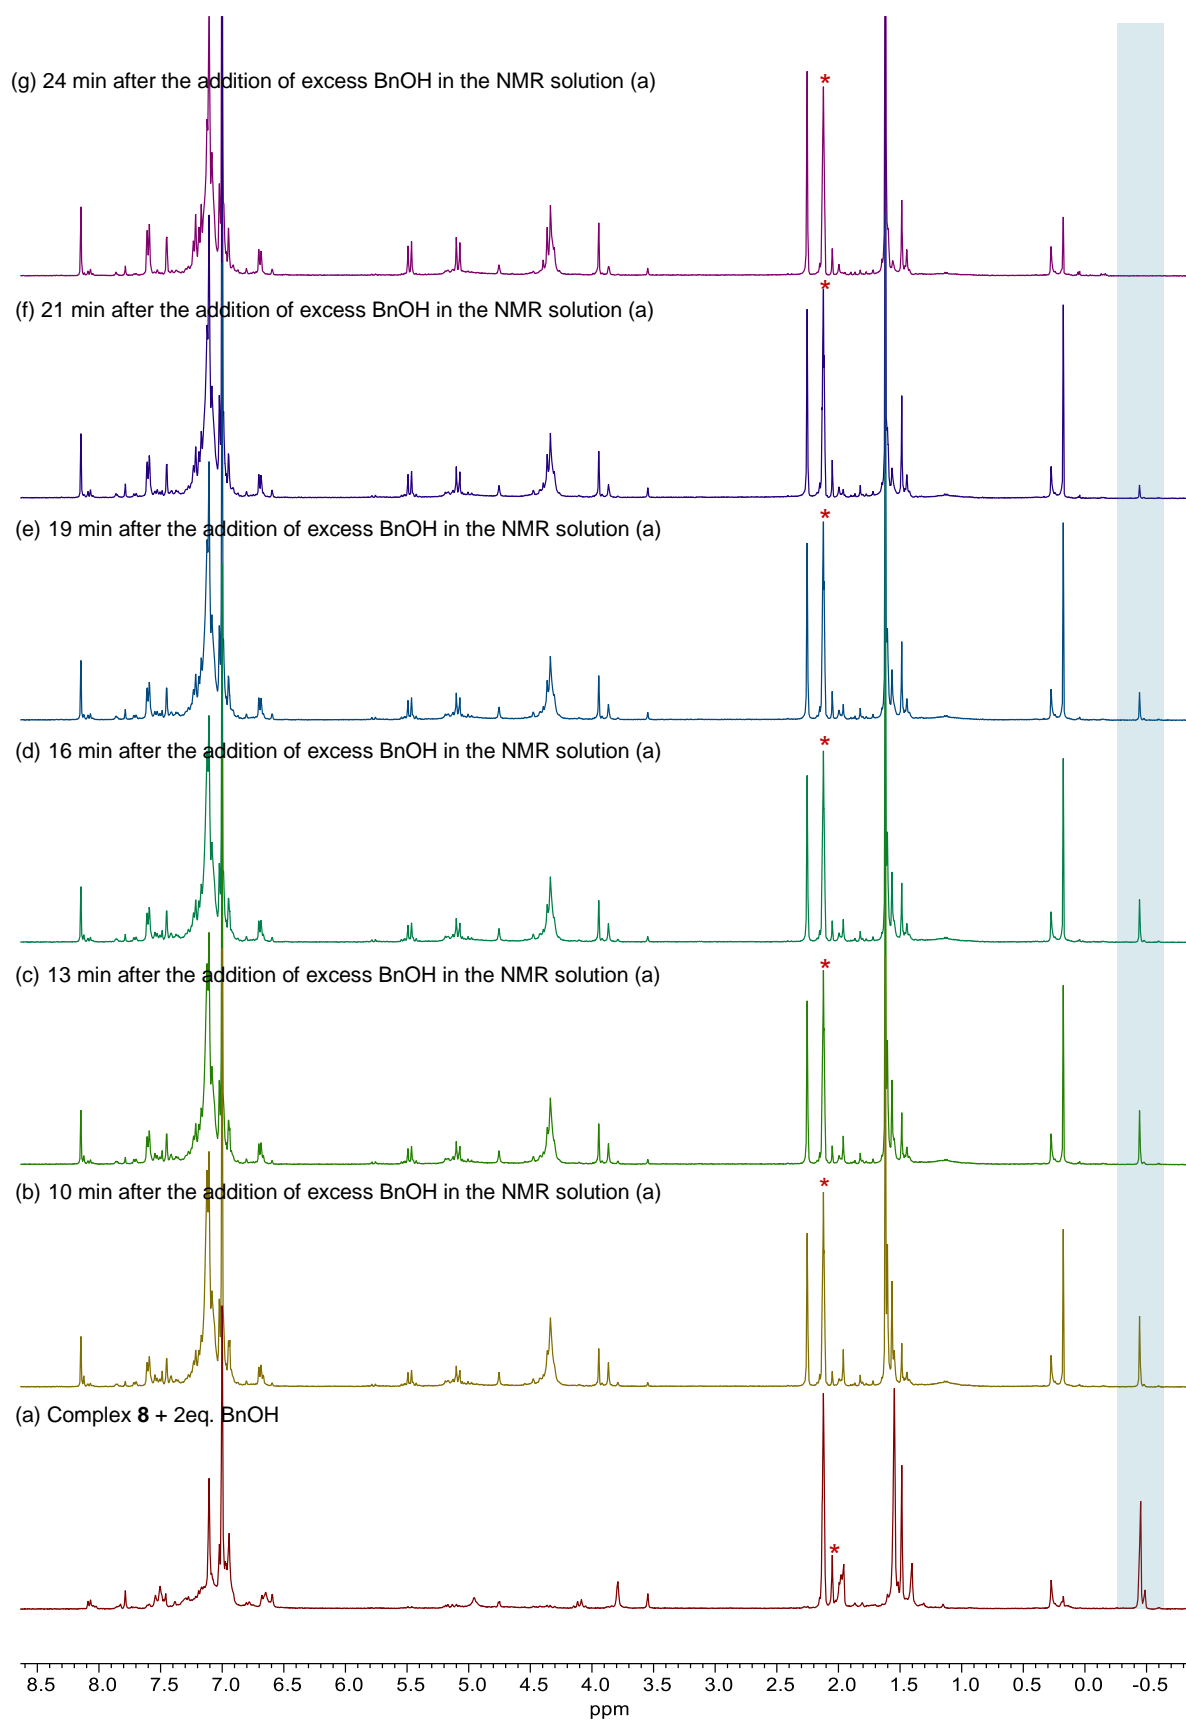

**Fig. S27**  $^1\text{H}$  NMR spectra of (a) the reaction mixture of complex **8** and 2 equivalents of BnOH, (b) 10 min (c) 13 min, (d) 16 min, (e) 19 min, (f) 21 min, (g) 24 min after the addition of excess amount of BnOH into the NMR solution of (a) in  $d^8$ -toluene at 70 °C (\* =  $d^8$ -toluene).

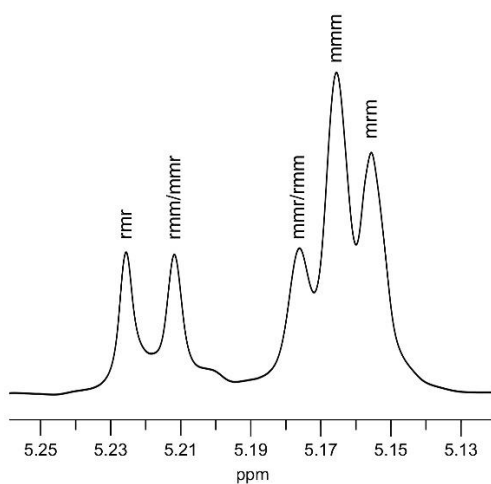

**Fig. S28** Homonuclear decoupled <sup>1</sup>H NMR spectrum of the methine region of PLA prepared from *rac*-LA at 70 °C in toluene (500 MHz, CDCl<sub>3</sub>) with complex **1**/BnOH.

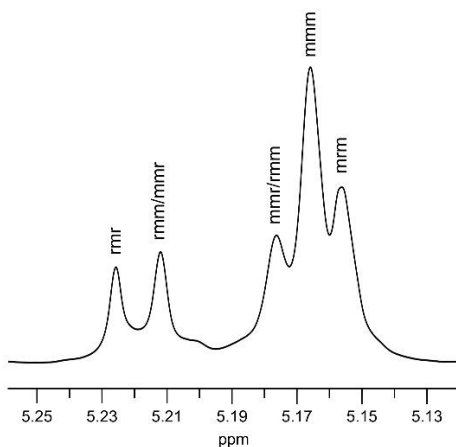

**Fig. S29** Homonuclear decoupled <sup>1</sup>H NMR spectrum of the methine region of PLA prepared from *rac*-LA at 70 °C in toluene (500 MHz, CDCl<sub>3</sub>) with complex **2**/BnOH.

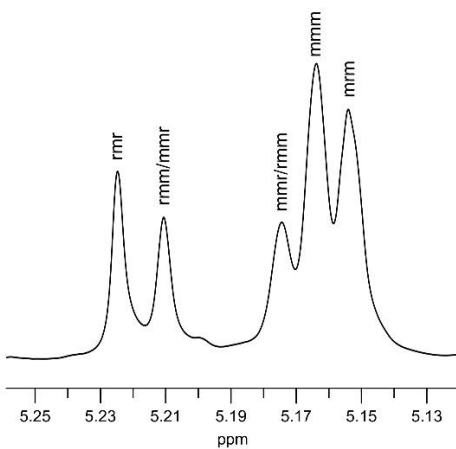

**Fig. S30** Homonuclear decoupled <sup>1</sup>H NMR spectrum of the methine region of PLA prepared from *rac*-LA at 70 °C in toluene (500 MHz, CDCl<sub>3</sub>) with complex **3**/BnOH.

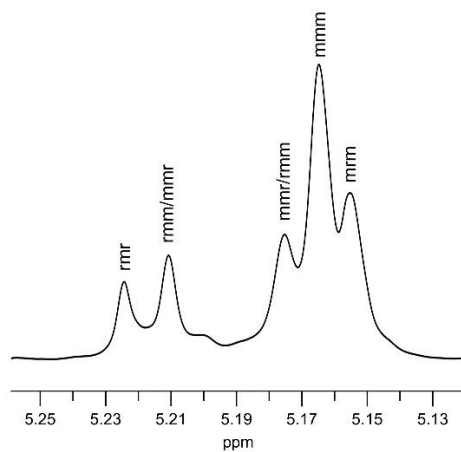

**Fig. S31** Homonuclear decoupled  $^1\text{H}$  NMR spectrum of the methine region of PLA prepared from *rac*-LA at 70 °C in toluene (500 MHz,  $\text{CDCl}_3$ ) with complex **4**/BnOH.

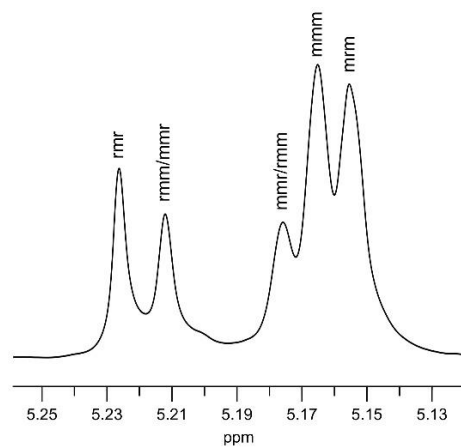

**Fig. S32** Homonuclear decoupled  $^1\text{H}$  NMR spectrum of the methine region of PLA prepared from *rac*-LA at 70 °C in toluene (500 MHz,  $\text{CDCl}_3$ ) with complex **5**/BnOH.

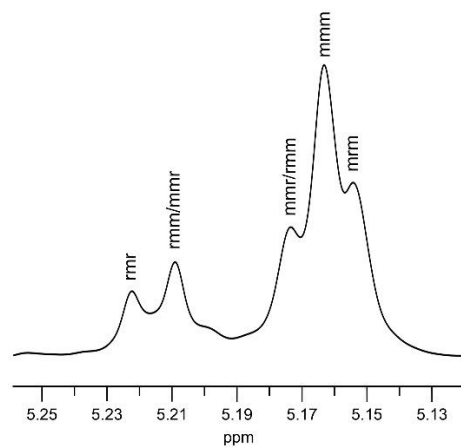

**Fig. S33** Homonuclear decoupled  $^1\text{H}$  NMR spectrum of the methine region of PLA prepared from *rac*-LA at 70 °C in toluene (500 MHz,  $\text{CDCl}_3$ ) with complex **6**/BnOH.



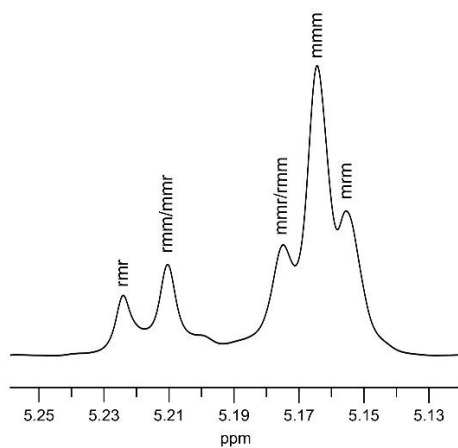

**Fig. S34** Homonuclear decoupled  $^1\text{H}$  NMR spectrum of the methine region of PLA prepared from *rac*-LA at 70 °C in toluene (500 MHz,  $\text{CDCl}_3$ ) with complex **7**/BnOH.

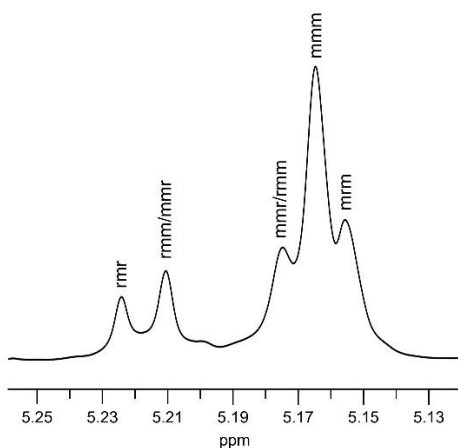

**Fig. S35** Homonuclear decoupled  $^1\text{H}$  NMR spectrum of the methine region of PLA prepared from *rac*-LA at 70 °C in toluene (500 MHz,  $\text{CDCl}_3$ ) with complex **8**/BnOH.

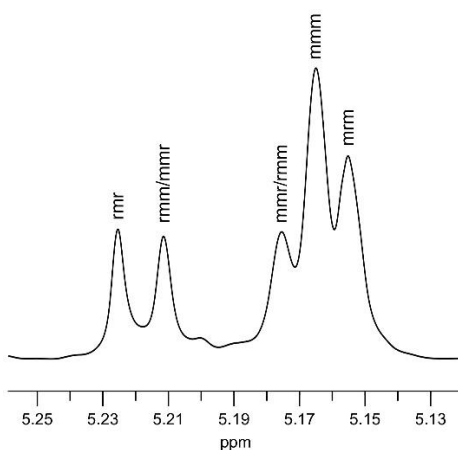

**Fig. S36** Homonuclear decoupled  $^1\text{H}$  NMR spectrum of the methine region of PLA prepared from *rac*-LA at 70 °C in toluene (500 MHz,  $\text{CDCl}_3$ ) with complex **9**/BnOH.

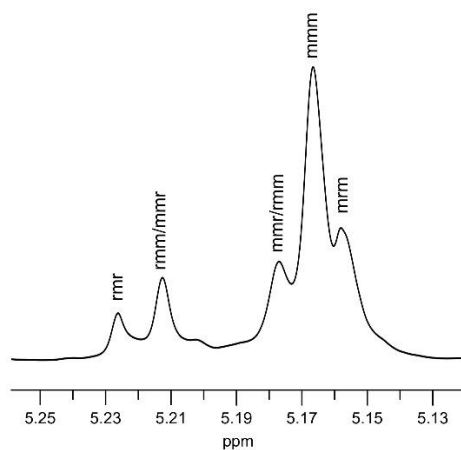

**Fig. S37** Homonuclear decoupled  $^1\text{H}$  NMR spectrum of the methine region of PLA prepared from *rac*-LA at 70 °C in toluene (500 MHz,  $\text{CDCl}_3$ ) with complex **10**/BnOH.

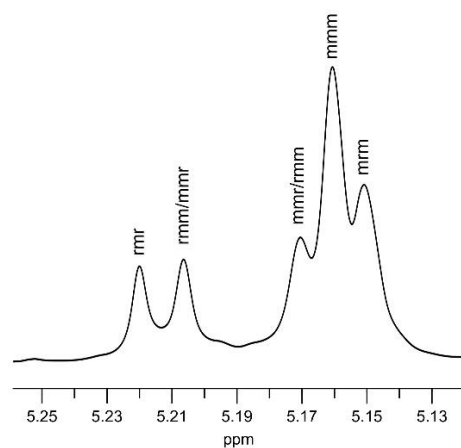

**Fig. S38** Homonuclear decoupled  $^1\text{H}$  NMR spectrum of the methine region of PLA prepared from *rac*-LA at 70 °C in toluene (500 MHz,  $\text{CDCl}_3$ ) with complex **11**/BnOH.

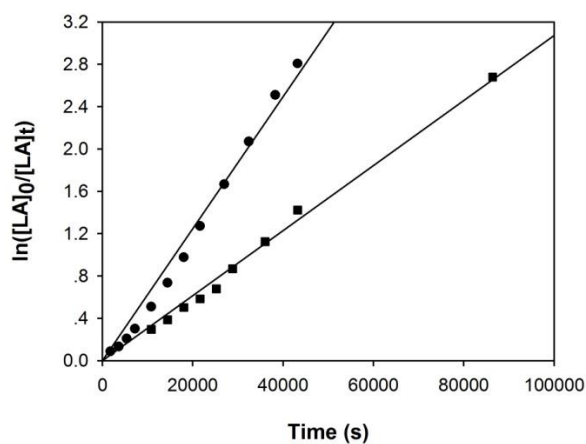

**Fig. S39** Semilogarithmic plots of *rac*-lactide conversion *versus* time in toluene at 70 °C with complexes **1** (●) and **7** (■) ( $[LA]_0:[Int]_0:[BnOH]_0 = 100:1:2$ ,  $[LA]_0 = 0.83 \text{ M}$ ,  $[Int]_0 = 8.33 \text{ mM}$ ).

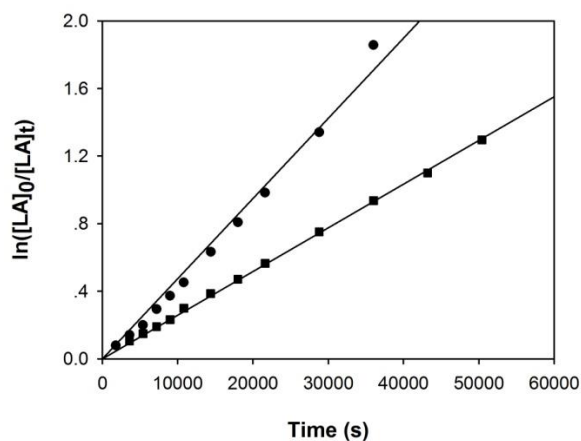

**Fig. S40** Semilogarithmic plots of *rac*-lactide conversion *versus* time in toluene at 70 °C with complexes **3** (●) and **9** (■) ( $[\text{LA}]_0:[\text{Int}]_0:[\text{BnOH}]_0 = 100:1:2$ ,  $[\text{LA}]_0 = 0.83 \text{ M}$ ,  $[\text{Int}]_0 = 8.33 \text{ mM}$ ).

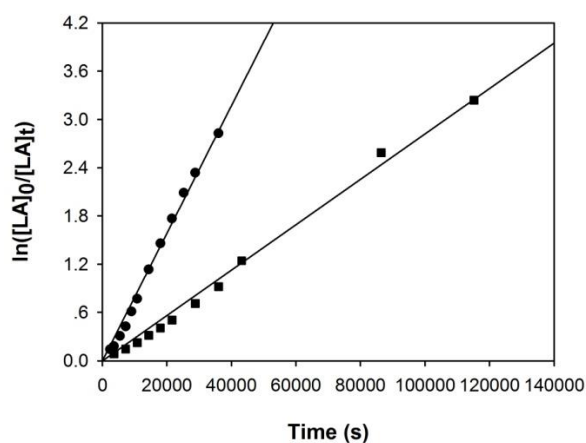

**Fig. S41** Semilogarithmic plots of *rac*-lactide conversion *versus* time in toluene at 70 °C with complexes **4** (●) and **10** (■) ( $[\text{LA}]_0:[\text{Int}]_0:[\text{BnOH}]_0 = 100:1:2$ ,  $[\text{LA}]_0 = 0.83 \text{ M}$ ,  $[\text{Int}]_0 = 8.33 \text{ mM}$ ).

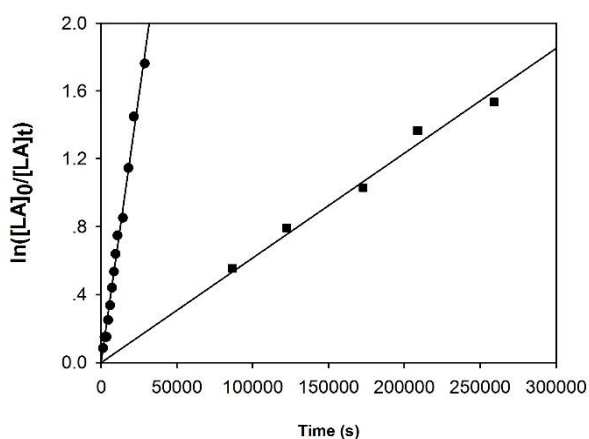

**Fig. S42** Semilogarithmic plots of *rac*-lactide conversion *versus* time in toluene at 70 °C with complexes **5** (●) and **11** (■) ( $[\text{LA}]_0:[\text{Int}]_0:[\text{BnOH}]_0 = 100:1:2$ ,  $[\text{LA}]_0 = 0.83 \text{ M}$ ,  $[\text{Int}]_0 = 8.33 \text{ mM}$ ).

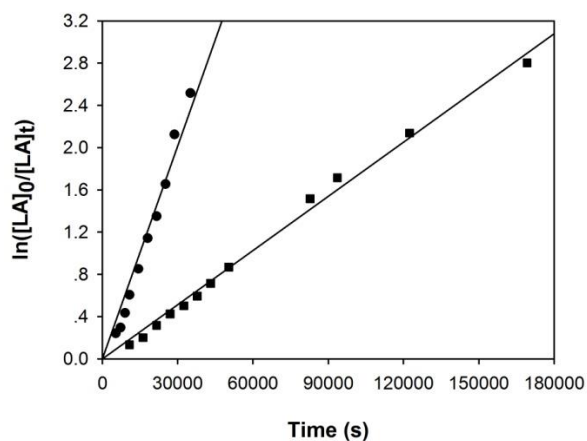

**Fig. S43** Semilogarithmic plots of *rac*-lactide conversion *versus* time in toluene at 70 °C with complexes **6** (●) and **12** (■) ( $[LA]_0:[Int]_0:[BnOH]_0 = 100:1:2$ ,  $[LA]_0 = 0.83$  M,  $[Int]_0 = 8.33$  mM).

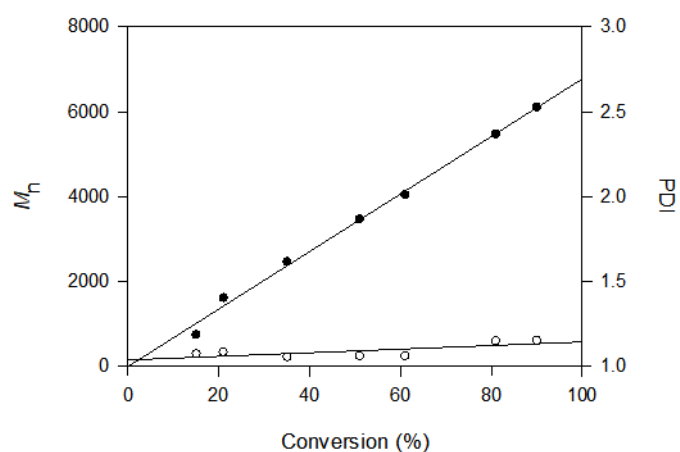

**Fig. S44** Plot of PLA  $M_n$  (●) and PDI (○) as a function of monomer conversion for a *rac*-LA polymerization using **13**/BnOH ( $[LA]_0:[Int]_0:[BnOH]_0 = 50:1:1$ , toluene, 70 °C).

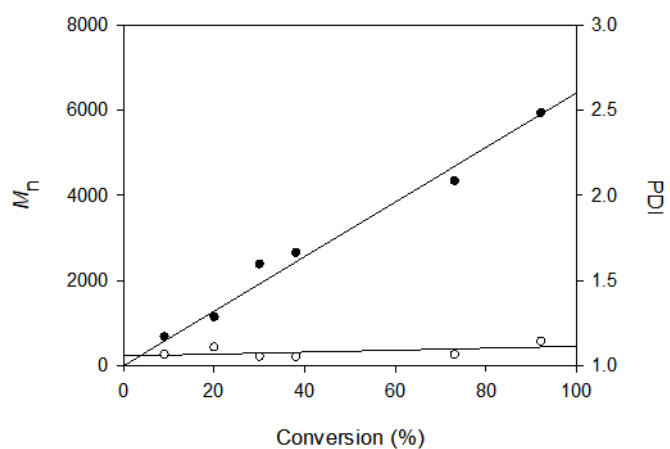

**Fig. S45** Plot of PLA  $M_n$  (●) and PDI (○) as a function of monomer conversion for a *rac*-LA polymerization using **14**/BnOH ( $[LA]_0:[Int]_0:[BnOH]_0 = 50:1:1$ , toluene, 70 °C).

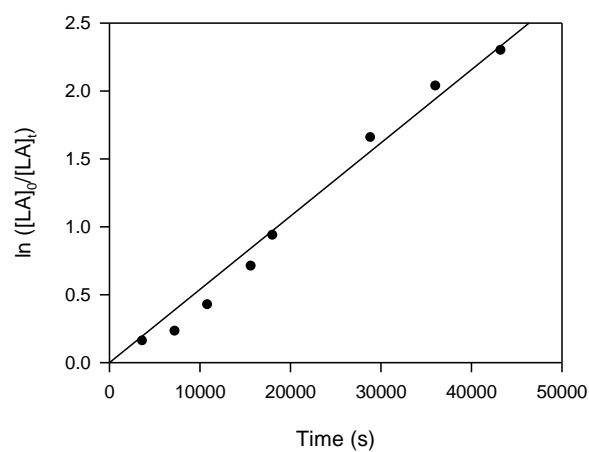

**Fig. S46** Semilogarithmic plots of *rac*-LA conversion *versus* time in toluene at 70 °C with complex **13** (●) ([LA]₀:[Int]₀:[BnOH]₀ = 50:1:1, [LA]₀ = 0.42 M, [Int]₀ = 8.33 mM).

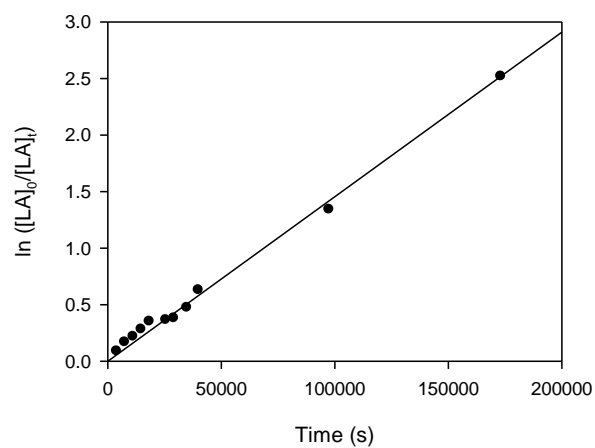

**Fig. S47** Semilogarithmic plots of *rac*-LA conversion *versus* time in toluene at 70 °C with complex **13** (●) ([LA]₀:[Int]₀:[BnOH]₀ = 50:1:1, [LA]₀ = 0.42 M, [Int]₀ = 8.33 mM).

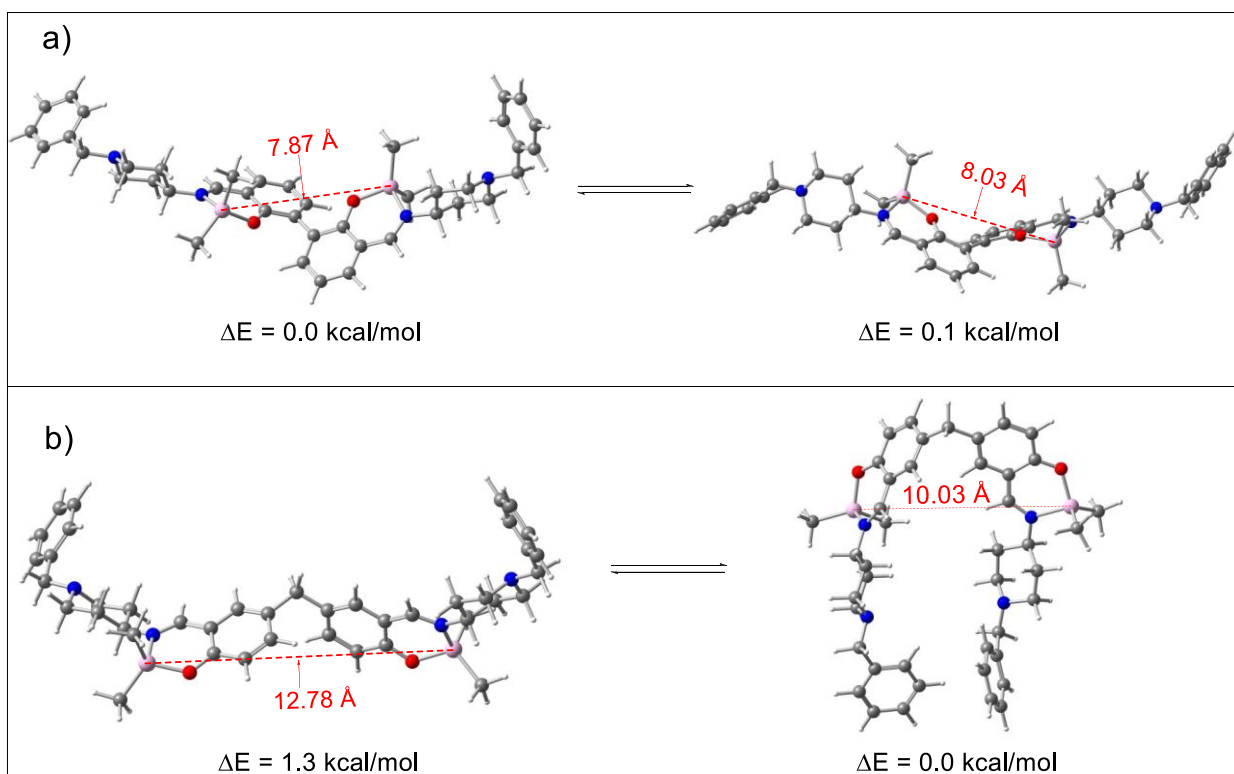

**Fig. S48** Al-Al distances in two configurations of complexes **I** (a) and **6** (b) optimized at the M06-2X/6-311G(d,p) method.

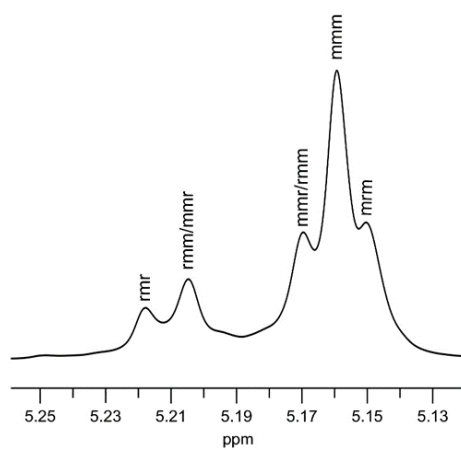

**Fig. S49** Homonuclear decoupled  $^1\text{H}$  NMR spectrum of the methine region of PLA prepared from *rac*-LA at  $70^\circ\text{C}$  in toluene (500 MHz,  $\text{CDCl}_3$ ) with complex **13**/BnOH.

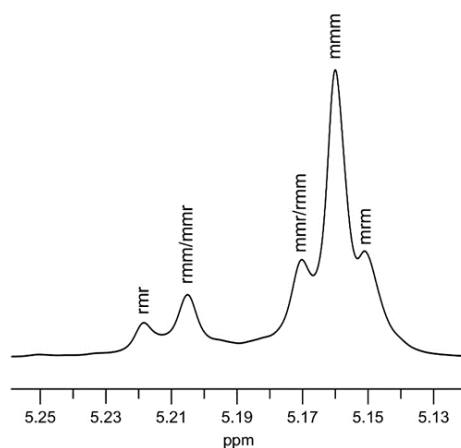

**Fig. S50** Homocoupled  $^1\text{H}$  NMR spectrum of the methine region of PLA prepared from *rac*-LA at 70 °C in toluene (500 MHz,  $\text{CDCl}_3$ ) with complex **14**/BnOH.

### Computational details

All geometry optimizations were carried out in the gas phase without molecular symmetry constraints using the hybrid meta exchange-correlation functional with double the amount of nonlocal exchange<sup>1-3</sup> (M06-2X) level of theory as implemented in the Gaussian09 program package.<sup>4</sup> The standard all-electron Pople basis set 6-311G(d,p) was applied to all atoms in the systems.<sup>5</sup>

- [1] U. Zhao and D. G. Truhlar, *J. Chem. Phys.*, 2006, **125**, 1–17.
- [2] Y. Zhao and D. G. Truhlar, *Theor. Chem. Acc.*, 2008, **120**, 215–241.
- [3] Y. Zhao and D. G. Truhlar, *Acc. Chem. Res.*, 2008, **41**, 157–167.
- [4] M. J. Frisch, G. W. Trucks, H. B. Schlegel, G. E. Scuseria, M. A. Robb, J. R. Cheeseman, G. Scalmani, V. Barone, B. Mennucci, G. A. Petersson, H. Nakatsuji, M. Caricato, X. Li, H. P. Hratchian, A. F. Izmaylov, J. Bloino, G. Zheng, J. L. Sonnenberg, M. Hada, M. Ehara, K. Toyota, R. Fukuda, J. Hasegawa, M. Ishida, T. Nakajima, Y. Honda, O. Kitao, H. Nakai, T. Vreven, J. A. Montgomery, Jr, J. E. Peralta, F. Ogliaro, M. Bearpark, J. J. Heyd, E. Brothers, K. N. Kudin, V. N. Staroverov, R. Kobayashi, J. Normand, K. Raghavachari, A. Rendell, J. C. Burant, S. S. Iyengar, J. Tomasi, M. Cossi, N. Rega, J. M. Millam, M. Klene, J. E. Knox, J. B. Cross, V. Bakken, C. Adamo, J. Jaramillo, R. Gomperts, R. E. Stratmann, O. Yazyev, A. J. Austin, R. Cammi, C. Pomelli, J. W. Ochterski, R. L. Martin, K. Morokuma, V. G. Zakrzewski, G. A. Voth, P. Salvador, J. J. Dannenberg, S. Dapprich, A. D. Daniels, Ö. Farkas, J. B. Foresman, J. V. Ortiz, J. Cioslowski and D. J. Fox, *Gaussian 09*, revision D.01; Gaussian, Inc.: Wallingford, CT, 2009.
- [5] W. J. Hehre, R. Ditchfield and J. A. Pople, *J. Chem. Phys.*, 1972, **56**, 2257–2261.
